# Supplementary material for: 2D-BN nanoparticles as a spectroscopic marker and drug delivery system with protection properties
Source: Royal Society of Chemistry journal article supplement (doi:10.1039/c8ra05085f), 2018-01-01
Supplement: c8ra05085f1.pdf [file c8ra05085f1.pdf]

## ***Supplementary Information***

### **2D-BN nanoparticles as spectroscopic marker and drug delivery system with protection property**

O. P. Gnatyuk<sup>\*a</sup>, G. I. Dovbeshko<sup>a</sup>, A. V. Yershov<sup>b</sup>, S. O. Karakhim<sup>c</sup>,  
O. Ilchenko<sup>d</sup>, O. Yu. Posudievsky<sup>e</sup>

<sup>a</sup> Department of Physics of Biological Systems, Institute of Physics of the National Academy of Sciences of Ukraine, Prospekt Nauki 46, Kiev 03039, Ukraine; e-mail: hrysantemka@gmail.com

<sup>b</sup> Institute of Molecular Biology and Genetics of the National Academy of Sciences of Ukraine, Zabolotnogo Str. 150, Kyiv 03680, Ukraine.

<sup>c</sup> Palladin Institute of Biochemistry of the National Academy of Sciences of Ukraine, Leontovicha Street 9, Kyiv 01601, Ukraine.

<sup>d</sup> Department of Micro & Nanotechnology, Technical University of Denmark, Denmark. e-mail: olil@nanotech.dtu.dk

<sup>e</sup> L.V. Pisarzhevsky Institute of Physical Chemistry of the National Academy of Sciences of Ukraine, Prospekt Nauki 31, Kyiv 03028, Ukraine.

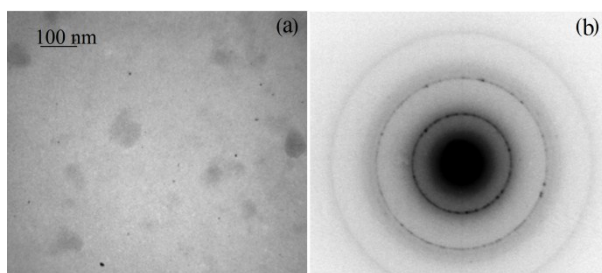

Figure S1. (a) TEM images of 2D-BN particles from aqueous dispersion; (b) typical selected area electron diffraction pattern for 2D-BN particles.

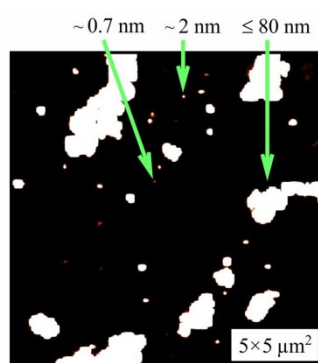

Figure S2. AFM images of 2D-BN particles deposited on the surface of the freshly cleaved mica from aqueous dispersions.

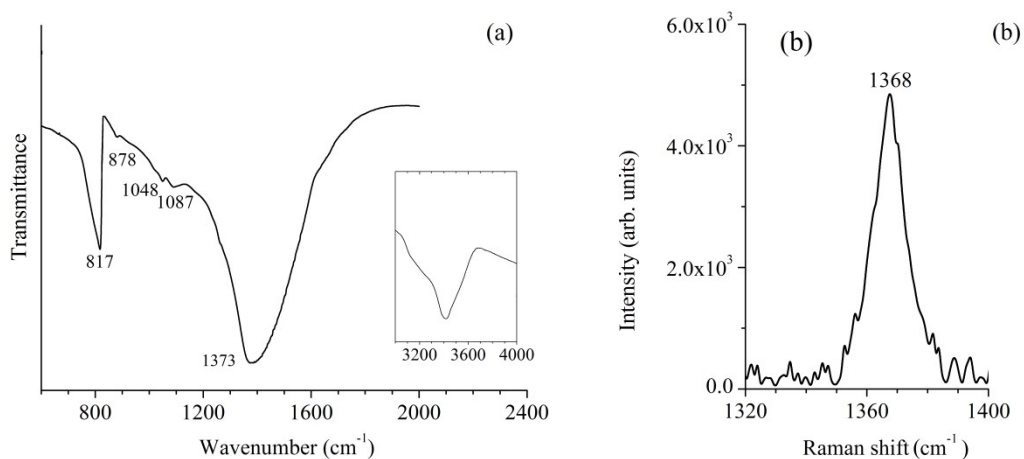

Figure S3. (a) FTIR and (b) Raman ( $\lambda_{\text{ex}} = 632.8 \text{ nm}$ ) spectra of 2D-BN particles.

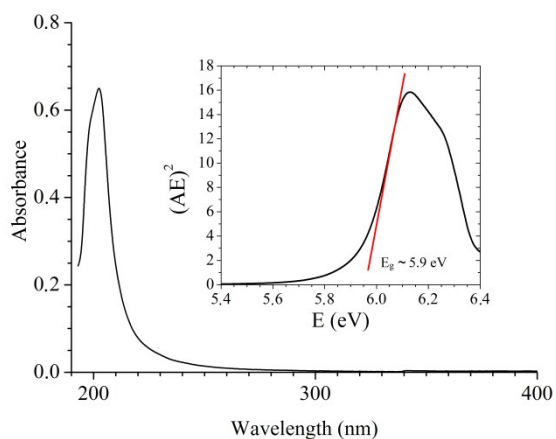

Figure S4. UV-vis spectrum of 2D-BN dispersion in EtOH. Inset: spectrum linearization on the assumption of the allowed direct electron transitions.

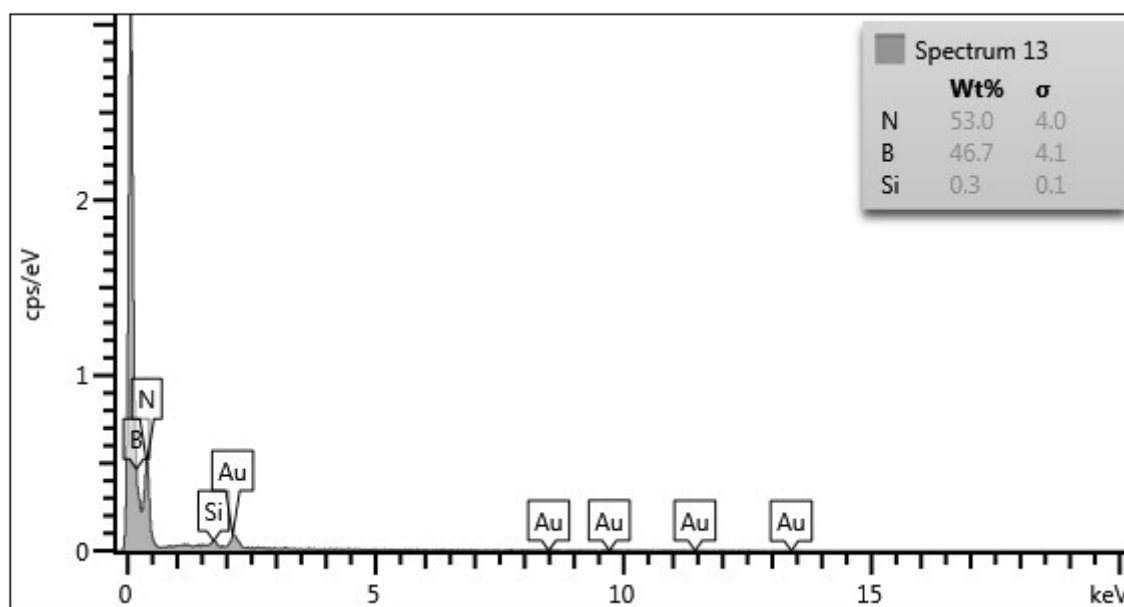

Figure S5. Characterization of 2D-BN nanoparticles by FEI Techai CF 20 transmission electron microscope. Elemental analysis shows the presence of defects in crystal structure and Si.

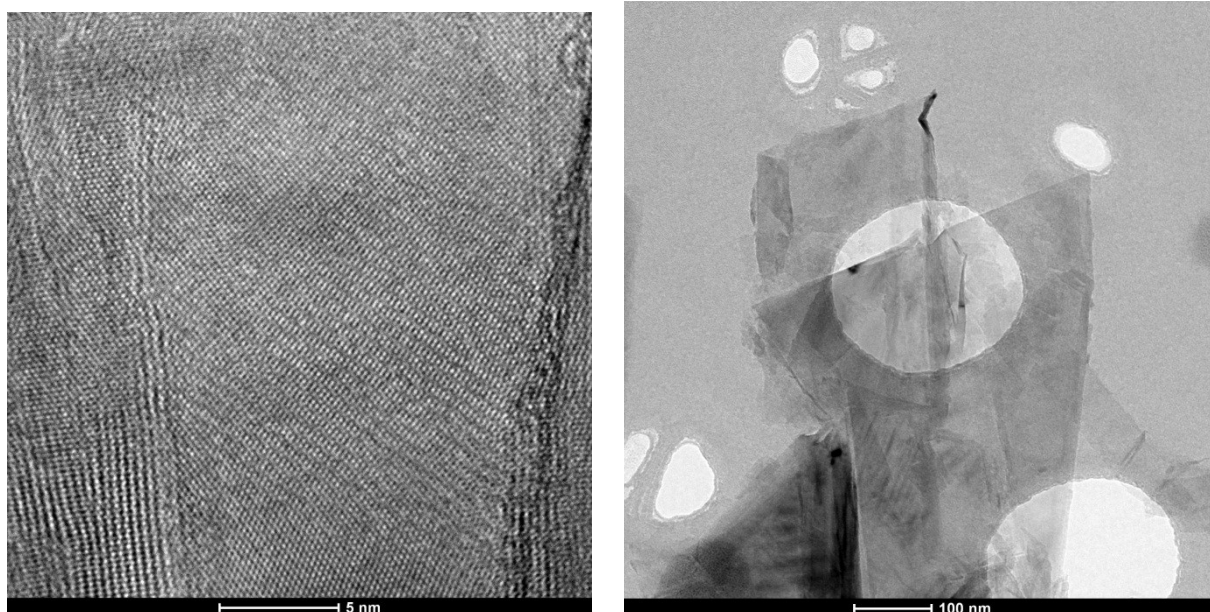

Figure S6. Characterization of 2D-BN nanoparticles done with FEI Techai CF 20 transmission electron microscope. Interlayer distance is equal to 0.34 nm.

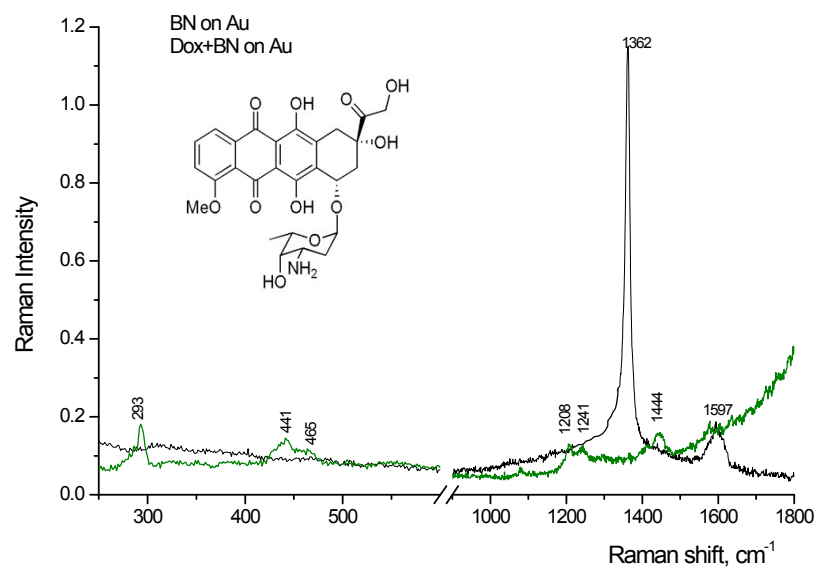

Figure S7. Raman spectra of 2D-BN (black curve) and 2D-BN:DOX (green curve) using  $\lambda_{\text{ex}} = 785 \text{ nm}$ , 100 mW.

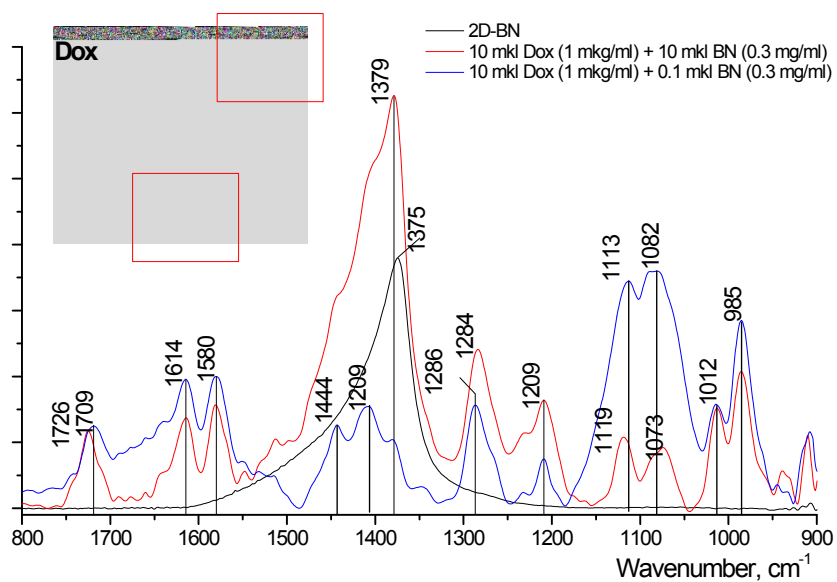

Figure S8. FTIR spectra of 2D-BN and 2D-BN:DOX in 900-1800  $\text{cm}^{-1}$  range.

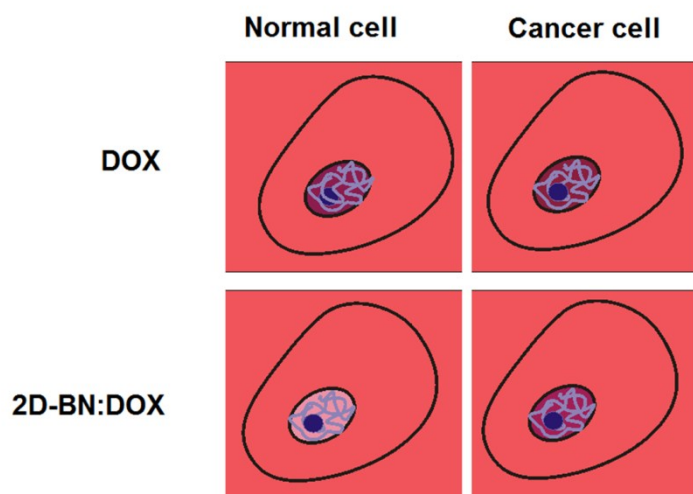

Figure S9. Schematic explanation of lower toxicity of 2D-BN:DOX in comparison with DOX for normal cells (DOX concentration is represented by different tones of red color).
